# Supplementary material for: Abnormal low-temperature behavior of a continuous photocurrent in Bi2S3 nanowires
Source: Royal Society of Chemistry journal article supplement (doi:10.1039/c3tc30943f), 2013-01-01
Supplement: c3tc30943f.pdf [file c3tc30943f.pdf]

Supplementary Information for:

## Low-temperature abnormal behavior of continuous photocurrent in Bi<sub>2</sub>S<sub>3</sub> nanowires

Renxiong Li,<sup>a</sup> Qu Yue<sup>b</sup> and Zhongming Wei\*<sup>a</sup>

<sup>a</sup>State Key Laboratory for Superlattices and Microstructures, Institute of Semiconductors, Chinese

Academy of Sciences, P.O. Box 912, Beijing 100083, China. E-mail: [zmwei@semi.ac.cn](mailto:zmwei@semi.ac.cn)

<sup>b</sup>College of Science, National University of Defense Technology, Changsha 410073, Hunan

Province, China.

### Table of Contents

| NO. | Description                                                                     |
|-----|---------------------------------------------------------------------------------|
| 1.  | Calculated band structure of Bi <sub>2</sub> S <sub>3</sub> NWs.                |
| 2.  | The first six-period photocurrent curve at 50 K before the steady photocurrent. |
| 3.  | Photoresponsive curves under different diode laser intensity.                   |

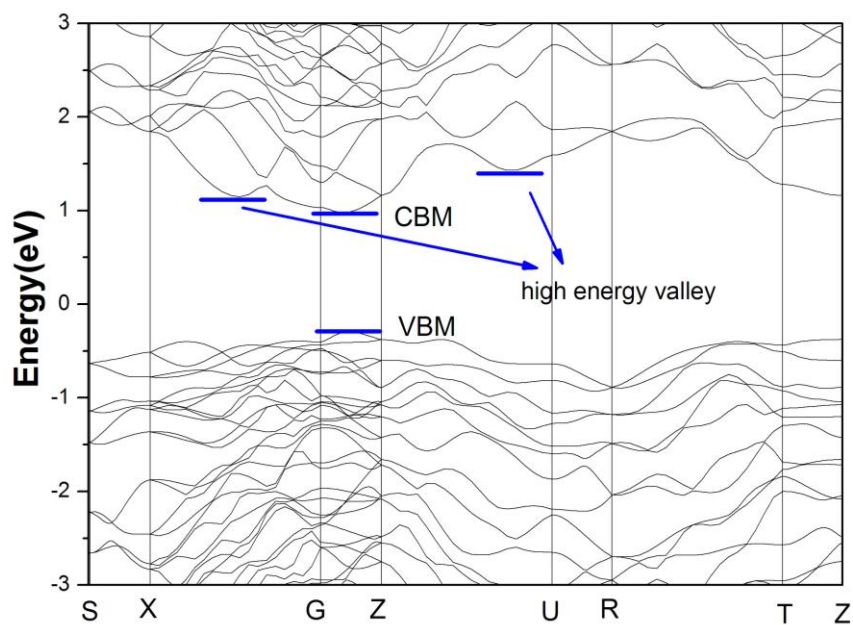

**Figure S1.** Band structure of calculated Bi<sub>2</sub>S<sub>3</sub> NWs. The blue lines indicate the high energy valleys located in conduction band (including the bottom of conduction band).

Electronic structure calculations were performed using the Vienna ab initio simulation package (VASP).<sup>1</sup> The generalized gradient approximation (GGA) of Perdew, Burke, and Ernzerhof was used for the exchange and correlation potentials.<sup>2</sup> The experimental lattice constants were used for the calculation ( $a = 11.305 \text{ \AA}$ ,  $b = 11.147 \text{ \AA}$ ,  $c = 3.981 \text{ \AA}$ ).<sup>3</sup> The cutoff energy of the plane-wave basis was 500 eV, and  $6 \times 6 \times 6$  k-point meshes were used for the Brillouin zone integration. The atomic relaxation was carried out until forces were less than  $0.02 \text{ eV \AA}^{-1}$ . The calculation result showed that the  $\text{Bi}_2\text{S}_3$  had the fundamental gap and the direct band. The difference between direct and indirect gaps was about 0.05 eV. This suggested  $\text{Bi}_2\text{S}_3$  can be seen as a nearly direct band gap of 1.24 eV.

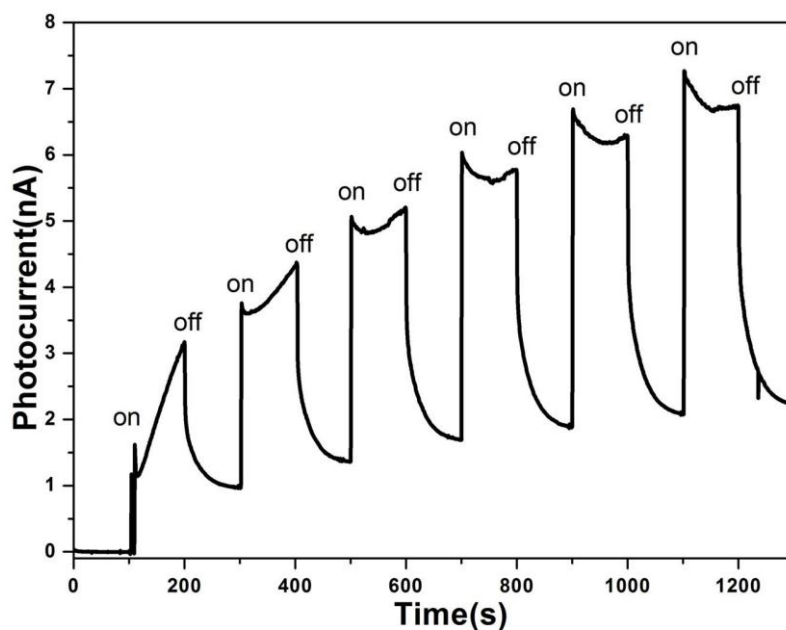

**Figure S2.** The first six periods of photocurrent at 50 K with an intensity of  $195 \text{ mW cm}^{-2}$  (bias voltage: 5 V). The photocurrent gradually increases to get the steady, and the abnormal behavior shows more obviously, too.

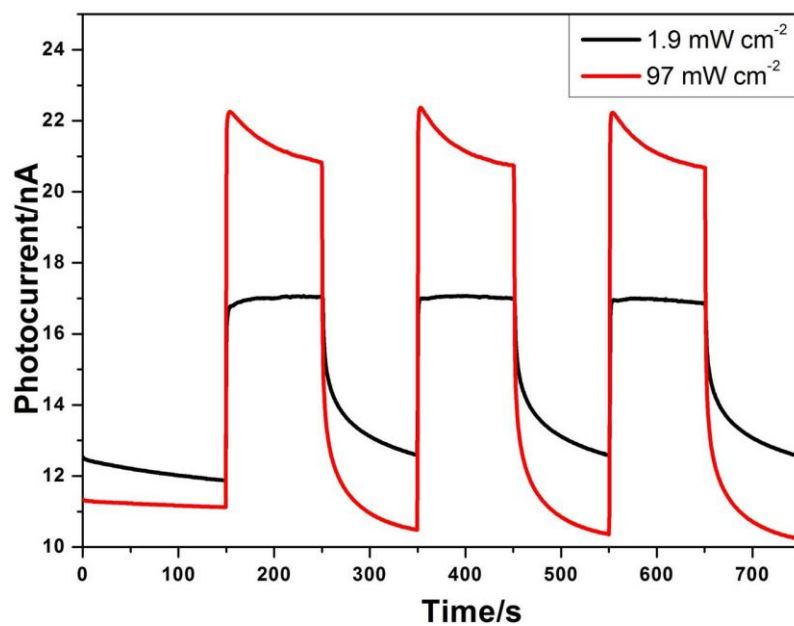

**Figure S3.** Photoresponsive curves measured under different laser irradiating intensity (bias voltage, 5 V; temperature, 50 K).

**References:**

- 1 G. Kresse and Furthmüller, *J. Phys. Rev. B*, 1996, 54, 11169.
- 2 J. P. Perdew, K. Burke and M. Ernzerhof, *Phys. Rev. Lett.*, 1996, 77, 3865.
- 3 R. Caracas and X. Gonze, *Phys. Chem. Minerals*, 2005, 32, 295.
